# Supplementary material for: Programmed pH-responsive core–shell nanoparticles for precisely targeted therapy of ulcerative colitis
Source: Royal Society of Chemistry journal article supplement (doi:10.1039/d2nr04968f), 2022-12-27
Supplement: d2nr04968f1.pdf [file d2nr04968f1.pdf]

## Supplementary Materials

### Programmed pH-responsive core-shell nanoparticles for precisely targeted therapy of ulcerative colitis

*Authors:*

Guangshuai Zhang <sup>a</sup>, Wen Han <sup>a</sup>, Peixu Zhao <sup>a</sup>, Zijun Wang <sup>b</sup>, Mo Li <sup>c</sup>, Xiaofan Sui <sup>c</sup>, Yanhua Liu <sup>d</sup>, Baocheng Tian <sup>e</sup>, Zhonggui He <sup>a</sup>, Qiang Fu <sup>a\*</sup>

*Affiliations:*

<sup>a</sup>. Wuya College of Innovation, Shenyang Pharmaceutical University, No. 103, Wenhua Road, Shenyang 110016, China.

<sup>b</sup>. West China School of Pharmacy, Sichuan University, No. 17, Section 3, Renmin South Road, Chengdu 610041, China.

<sup>c</sup>. Liaoning Institute for Drug Control, No. 7 Chongshan West Road, Shenyang 110016, China.

<sup>d</sup>. Ningxia Medical University, No. 1160 Shengli Street, Xingqing District, Yinchuan 750004, China

<sup>e</sup>. School of Pharmacy, Binzhou Medical University, No. 346, Guanhai Road, Yantai 264003, China.

\*Corresponding author:

**Qiang Fu, Ph.D.**

Professor

Shenyang Pharmaceutical University

Wuya College of Innovation

No. 103, Wenhua Road

Shenyang

China

**Phone/Fax:** +86-24-23986325

**Email:** graham\_pharm@aliyun.com; fuqiang@syphu.edu.cn

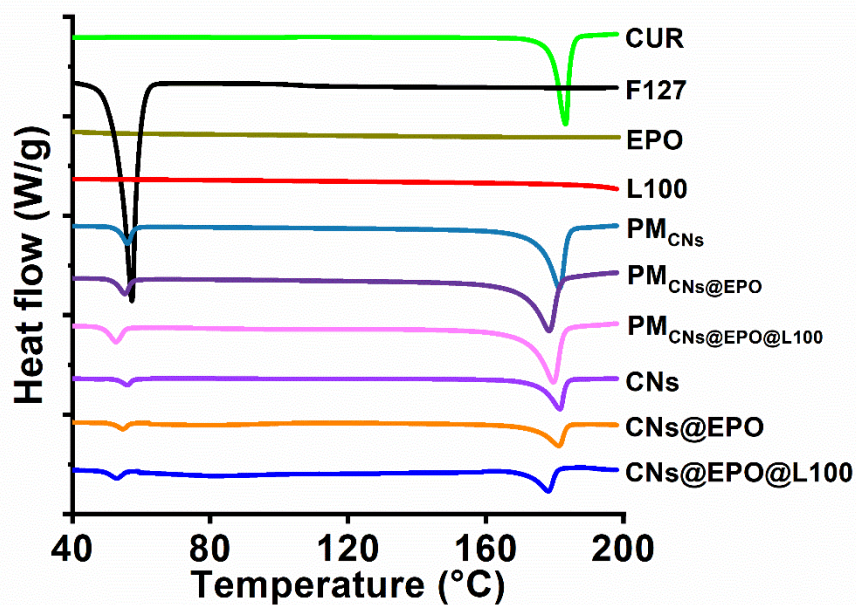

**Fig. S1** DSC thermograms of CUR, F127, EPO, L100, physical mixture, CNs, CNs@EPO, and CNs@EPO@L100.

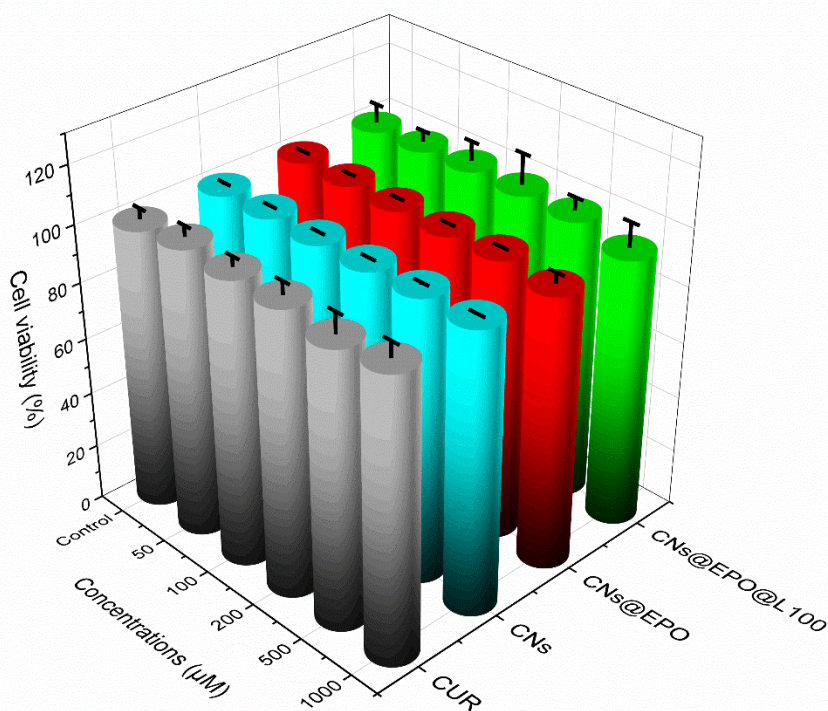

**Fig. S2** The cytotoxicity of CUR suspension, CNs, CNs@EPO, and CNs@EPO@L100 on RAW 264.7 cells at different concentrations after incubation for 12 h (mean  $\pm$  SD, n = 6).

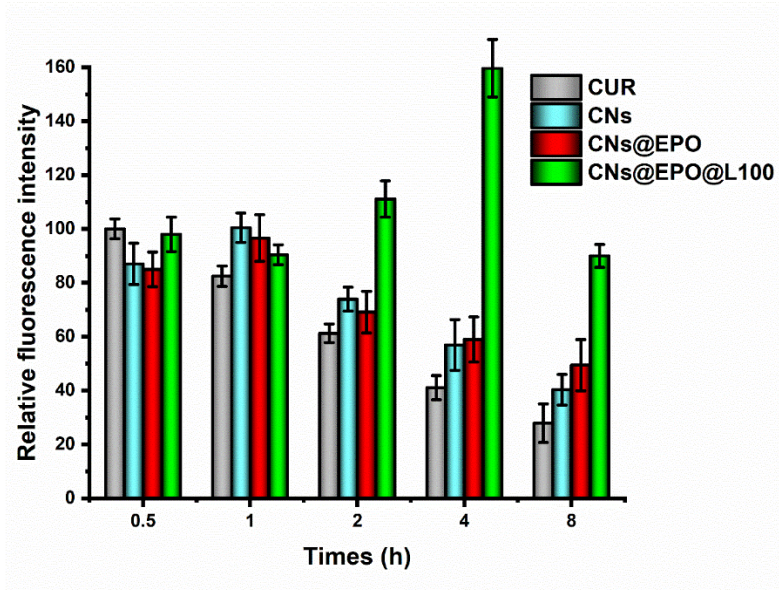

**Fig. S3** Relative fluorescence intensity in the colon after intragastric administration of CUR suspension, CNs, CNs@EPO, and CNs@EPO@L100 at a dose of 100 mg/kg to UC mice. The fluorescence intensity of mice treated with CUR suspension for 0.5 h was used as a control.

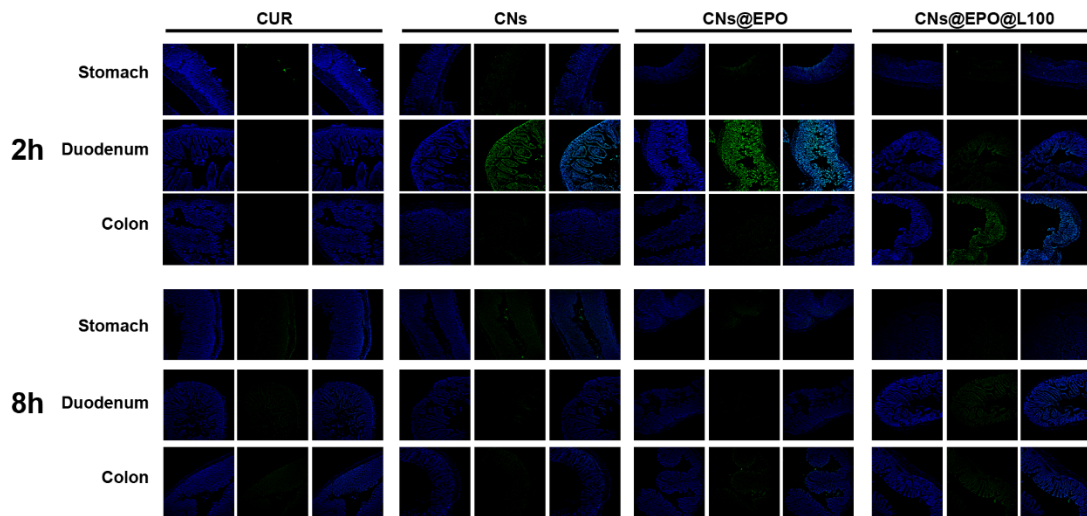

**Fig. S4** Confocal microscopy images of cryosections of stomach, duodenum, and colon after intragastric administration of CUR suspension, CNs, CNs@EPO, and CNs@EPO@L100 at a dose of 100 mg/kg to UC mice for 2 and 8 h. Blue: Hoechst; Green: CUR.

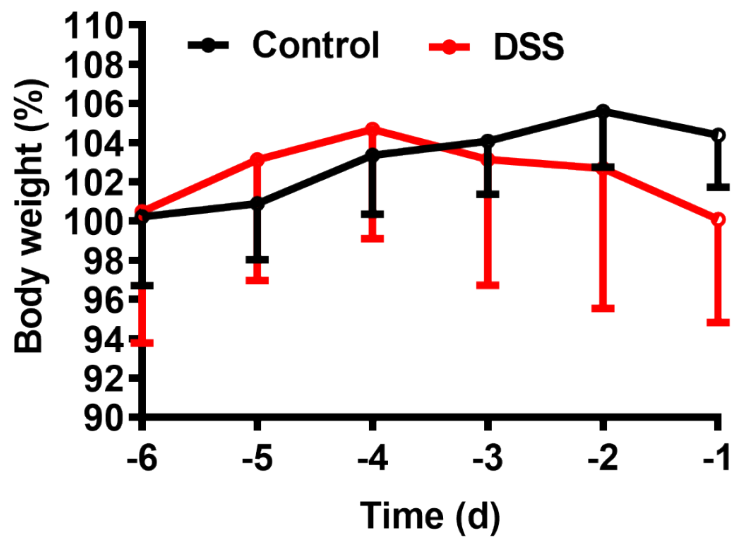

**Fig. S5.** The body weights of mice during modeling. The day of first administration was set to day 0. Mean  $\pm$  SD ( $n = 5$  for control group,  $n = 25$  for DSS group).

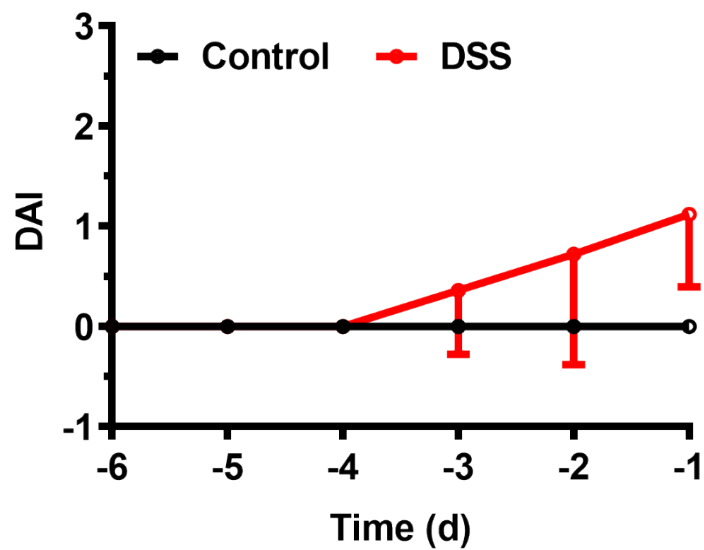

**Fig. S6.** The DAI of mice during modeling. The day of first administration was set to day 0. Mean  $\pm$  SD ( $n = 5$  for control group,  $n = 25$  for DSS group).

**Table S1** The particle sizes, PDIs, and zeta potentials of CNs, CNs@EPO, and CNs@EPO@L100 (mean  $\pm$  SD, n=3).

| Samples      | Particle sizes (nm) | PDIs              | Zeta potentials (mV) |
|--------------|---------------------|-------------------|----------------------|
| CNs          | 313.2 $\pm$ 12.83   | 0.215 $\pm$ 0.03  | -8.98 $\pm$ 0.7039   |
| CNs@EPO      | 324.2 $\pm$ 4.05    | 0.355 $\pm$ 0.04  | 18.3 $\pm$ 1.435     |
| CNs@EPO@L100 | 571.8 $\pm$ 16.25   | 0.348 $\pm$ 0.089 | -18.1 $\pm$ 1.17     |

**Table S2** Scoring system for the disease activity index (DAI)

| Score | Weight loss (%) | Stool consistency | Rectal bleeding                                                           |
|-------|-----------------|-------------------|---------------------------------------------------------------------------|
| 0     | < 1             | Normal stools     | None                                                                      |
| 1     | 1 ~ 5           | -                 | Small spots of blood stool<br>dry anal region                             |
| 2     | 5 ~ 10          | Semi-formed stool | Large spots of blood in stool<br>blood appear through the<br>anal orifice |
| 3     | 10 ~ 15         | -                 | Deep red stool blood spreads<br>largely around the anus                   |
| 4     | > 15            | liquid stool      | Gross blood                                                               |
